# Supplementary material for: Role of excited-state hydrogen detachment and hydrogen-transfer processes for the excited-state deactivation of an aromatic dipeptide: N-acetyl tryptophan methyl amide
Source: Royal Society of Chemistry journal article supplement (doi:10.1039/b927024h), 2010-01-01
Supplement: b927024h.pdf [file b927024h.pdf]

XYZ coordinates in Ångstrom of the ground state optimized structures of NATMA A, NATMA B and NATMA C.

**NATMA A:**

36

FINAL HEAT OF FORMATION = -855.966444

|   |           |           |           |
|---|-----------|-----------|-----------|
| C | 1.931665  | -0.687825 | 1.273429  |
| C | 1.655953  | 0.477912  | 0.516005  |
| C | 2.730841  | 1.142936  | -0.156477 |
| C | 4.059109  | 0.674615  | -0.099254 |
| C | 4.302211  | -0.476851 | 0.657560  |
| C | 3.249616  | -1.149579 | 1.335955  |
| C | 0.451246  | 1.222973  | 0.246427  |
| C | 0.828844  | 2.286915  | -0.569040 |
| N | 2.189014  | 2.229497  | -0.813433 |
| C | -0.938263 | 0.872053  | 0.686286  |
| C | -1.656254 | -0.082903 | -0.304530 |
| N | -2.969709 | -0.456427 | 0.171215  |
| C | -0.854750 | -1.374282 | -0.468640 |
| O | -1.037472 | -2.331825 | 0.289604  |
| N | 0.045112  | -1.360139 | -1.490722 |
| H | 2.716576  | 2.923220  | -1.330707 |
| H | 0.219536  | 3.092259  | -0.983082 |
| H | 4.872736  | 1.192033  | -0.619787 |
| H | 5.323363  | -0.866186 | 0.728001  |
| H | 3.479102  | -2.049420 | 1.916573  |
| H | 1.123626  | -1.229256 | 1.777602  |
| H | -0.915197 | 0.376165  | 1.673270  |
| H | -1.566112 | 1.774300  | 0.772012  |

|   |           |           |           |
|---|-----------|-----------|-----------|
| H | -1.766968 | 0.444015  | -1.268654 |
| H | -3.028001 | -1.349098 | 0.654958  |
| H | 0.223419  | -0.453422 | -1.912693 |
| C | 1.068120  | -2.385757 | -1.622261 |
| H | 2.038015  | -2.033933 | -1.230550 |
| H | 0.739970  | -3.253478 | -1.033709 |
| H | 1.178773  | -2.681513 | -2.677565 |
| C | -4.014998 | 0.423038  | 0.120686  |
| O | -3.909479 | 1.540036  | -0.388362 |
| C | -5.305481 | -0.078852 | 0.747244  |
| H | -5.421449 | 0.380970  | 1.742542  |
| H | -6.149706 | 0.251847  | 0.125109  |
| H | -5.330458 | -1.173923 | 0.855739  |

**NATMA B:**

36

FINAL HEAT OF FORMATION = -855.966719

|   |           |           |           |
|---|-----------|-----------|-----------|
| C | -1.369508 | -1.820593 | -0.382091 |
| C | -1.615787 | -0.625672 | 0.342713  |
| C | -2.941554 | -0.086948 | 0.385440  |
| C | -4.021906 | -0.700663 | -0.280267 |
| C | -3.751423 | -1.873330 | -0.993432 |
| C | -2.442395 | -2.426178 | -1.041891 |
| C | -0.774038 | 0.239391  | 1.132361  |
| C | -1.599127 | 1.250543  | 1.614705  |
| N | -2.891379 | 1.054690  | 1.161049  |
| C | 0.704741  | 0.076974  | 1.306778  |
| C | 1.468517  | 0.240451  | -0.035182 |

|   |           |           |           |
|---|-----------|-----------|-----------|
| N | 2.843060  | -0.185550 | 0.084978  |
| C | 1.474009  | 1.702544  | -0.480577 |
| O | 2.455120  | 2.428943  | -0.298994 |
| N | 0.316315  | 2.108220  | -1.073967 |
| H | -3.689652 | 1.625638  | 1.413689  |
| H | -1.353711 | 2.101288  | 2.252412  |
| H | -5.034076 | -0.283032 | -0.239761 |
| H | -4.567270 | -2.377509 | -1.522131 |
| H | -2.275870 | -3.350434 | -1.605061 |
| H | -0.363416 | -2.256954 | -0.408333 |
| H | 1.107707  | 0.803229  | 2.035371  |
| H | 0.931655  | -0.938501 | 1.674472  |
| H | 0.968124  | -0.386519 | -0.793350 |
| H | 3.541612  | 0.553762  | 0.099803  |
| H | -0.467983 | 1.462266  | -1.036423 |
| C | 0.058018  | 3.505778  | -1.370985 |
| H | -0.398467 | 3.609351  | -2.367777 |
| H | -0.609722 | 3.965883  | -0.620961 |
| H | 1.022886  | 4.030809  | -1.356109 |
| C | 3.162493  | -1.511001 | 0.019809  |
| O | 2.303119  | -2.391428 | -0.075723 |
| C | 4.649378  | -1.819946 | 0.054865  |
| H | 4.813529  | -2.689270 | 0.708271  |
| H | 4.979062  | -2.097010 | -0.959768 |
| H | 5.254292  | -0.970993 | 0.408087  |

**NATMA C:**

FINAL HEAT OF FORMATION = -855.969025

|   |           |           |           |
|---|-----------|-----------|-----------|
| C | -2.367474 | 1.069833  | 0.893180  |
| C | -1.951584 | -0.215519 | 0.456795  |
| C | -2.755028 | -0.911689 | -0.505752 |
| C | -3.943419 | -0.366425 | -1.031741 |
| C | -4.324780 | 0.902074  | -0.582788 |
| C | -3.544492 | 1.612552  | 0.369571  |
| C | -0.821289 | -1.057873 | 0.764120  |
| C | -0.970459 | -2.204473 | -0.010574 |
| N | -2.129341 | -2.112871 | -0.756450 |
| C | 0.306711  | -0.727549 | 1.703249  |
| C | 1.479120  | -0.026820 | 0.996795  |
| N | 0.963533  | 1.052200  | 0.160952  |
| C | 2.331724  | -1.038979 | 0.198702  |
| O | 2.053894  | -2.240209 | 0.139768  |
| N | 3.414262  | -0.465752 | -0.392128 |
| H | -2.458679 | -2.820110 | -1.403494 |
| H | -0.307729 | -3.065167 | -0.087591 |
| H | -4.547039 | -0.911706 | -1.765821 |
| H | -5.242141 | 1.355818  | -0.972068 |
| H | -3.877099 | 2.602347  | 0.699999  |
| H | -1.775589 | 1.627322  | 1.628271  |
| H | -0.067705 | -0.063127 | 2.501239  |
| H | 0.693731  | -1.642299 | 2.177314  |
| H | 2.148499  | 0.444010  | 1.740795  |
| H | 0.029498  | 0.930006  | -0.224905 |
| H | 3.561062  | 0.532651  | -0.225958 |
| C | 4.352230  | -1.229478 | -1.191918 |
| H | 4.431357  | -0.817799 | -2.212045 |

|   |           |           |           |
|---|-----------|-----------|-----------|
| H | 5.356465  | -1.235546 | -0.735226 |
| H | 3.979299  | -2.261687 | -1.245699 |
| C | 1.685185  | 2.161655  | -0.155297 |
| O | 2.868113  | 2.309036  | 0.181579  |
| C | 0.938156  | 3.206601  | -0.963861 |
| H | 1.162372  | 4.197093  | -0.540718 |
| H | 1.315786  | 3.194411  | -1.999349 |
| H | -0.150549 | 3.044119  | -0.971960 |
